# Supplementary material
Source: HighWire-hosted journal article supplement (https://bmjopen.bmj.com/content/6/4/e010734)
Supplement: inline-supplementary-material-1 [file inline-supplementary-material-1.pdf]

## Appendix: 1

| CONSORT 2010 checklist of information to include when reporting a randomised trial* |         |                                                                                                                                                                                             |
|-------------------------------------------------------------------------------------|---------|---------------------------------------------------------------------------------------------------------------------------------------------------------------------------------------------|
| Section/Topic                                                                       | Item No | Checklist Item                                                                                                                                                                              |
| <b>Title and abstract</b>                                                           |         |                                                                                                                                                                                             |
|                                                                                     | 1a      | Identification as a randomised trial in the title                                                                                                                                           |
|                                                                                     | 1b      | Structured summary of trial design, methods, results, and conclusions (for specific guidance see CONSORT for abstracts <sup>21, 25</sup> )                                                  |
| <b>Introduction</b>                                                                 |         |                                                                                                                                                                                             |
| Background and objectives                                                           | 2a      | Scientific background and explanation of rationale                                                                                                                                          |
|                                                                                     | 2b      | Specific objectives or hypotheses                                                                                                                                                           |
| <b>Methods</b>                                                                      |         |                                                                                                                                                                                             |
| Trial design                                                                        | 3a      | Description of trial design (such as parallel, factorial) including allocation ratio                                                                                                        |
|                                                                                     | 3b      | Important changes to methods after trial commencement (such as eligibility criteria), with reasons                                                                                          |
| Participants                                                                        | 4a      | Eligibility criteria for participants                                                                                                                                                       |
|                                                                                     | 4b      | Settings and locations where the data were collected                                                                                                                                        |
| Interventions                                                                       | 5       | The interventions for each group with sufficient details to allow replication, including how and when they were actually administered                                                       |
| Outcomes                                                                            | 6a      | Completely defined pre-specified primary and secondary outcome measures, including how and when they were assessed                                                                          |
|                                                                                     | 6b      | Any changes to trial outcomes after the trial commenced, with reasons                                                                                                                       |
| Sample size                                                                         | 7a      | How sample size was determined                                                                                                                                                              |
|                                                                                     | 7b      | When applicable, explanation of any interim analyses and stopping guidelines                                                                                                                |
| <b>Randomisation:</b>                                                               |         |                                                                                                                                                                                             |
| Sequence generation                                                                 | 8a      | Method used to generate the random allocation sequence                                                                                                                                      |
|                                                                                     | 8b      | Type of randomisation; details of any restriction (such as blocking and block size)                                                                                                         |
| Allocation concealment mechanism                                                    | 9       | Mechanism used to implement the random allocation sequence (such as sequentially numbered containers), describing any steps taken to conceal the sequence until interventions were assigned |
| Implementation                                                                      | 10      | Who generated the random allocation sequence, who enrolled participants, and who assigned participants to interventions                                                                     |
| Blinding                                                                            | 11a     | If done, who was blinded after assignment to interventions (for example, participants, care providers, those assessing outcomes) and how                                                    |
|                                                                                     | 11b     | If relevant, description of the similarity of interventions                                                                                                                                 |
| Statistical methods                                                                 | 12a     | Statistical methods used to compare groups for primary and secondary outcomes                                                                                                               |
|                                                                                     | 12b     | Methods for additional analyses, such as subgroup analyses and adjusted analyses                                                                                                            |
| <b>Results</b>                                                                      |         |                                                                                                                                                                                             |
| Participant flow (a diagram is strongly recommended)                                | 13a     | For each group, the numbers of participants who were randomly assigned, received intended treatment, and were analysed for the primary outcome                                              |
|                                                                                     | 13b     | For each group, losses and exclusions after randomisation, together with reasons                                                                                                            |
| Recruitment                                                                         | 14a     | Dates defining the periods of recruitment and follow-up                                                                                                                                     |
|                                                                                     | 14b     | Why the trial ended or was stopped                                                                                                                                                          |
| Baseline data                                                                       | 15      | A table showing baseline demographic and clinical characteristics for each group                                                                                                            |
| Numbers analysed                                                                    | 16      | For each group, number of participants (denominator) included in each analysis and whether the analysis was by original assigned groups                                                     |
| Outcomes and estimation                                                             | 17a     | For each primary and secondary outcome, results for each group, and the estimated effect size and its precision (such as 95% confidence interval)                                           |
|                                                                                     | 17b     | For binary outcomes, presentation of both absolute and relative effect sizes is recommended                                                                                                 |
| Ancillary analyses                                                                  | 18      | Results of any other analyses performed, including subgroup analyses and adjusted analyses, distinguishing pre-specified from exploratory                                                   |
| Harms                                                                               | 19      | All important harms or unintended effects in each group (for specific guidance see CONSORT for harms <sup>26</sup> )                                                                        |
| <b>Discussion</b>                                                                   |         |                                                                                                                                                                                             |
| Limitations                                                                         | 20      | Trial limitations, addressing sources of potential bias, imprecision, and, if relevant, multiplicity of analyses                                                                            |
| Generalisability                                                                    | 21      | Generalisability (external validity, applicability) of the trial findings                                                                                                                   |
| Interpretation                                                                      | 22      | Interpretation consistent with results, balancing benefits and harms, and considering other relevant evidence                                                                               |
| <b>Other information</b>                                                            |         |                                                                                                                                                                                             |
| Registration                                                                        | 23      | Registration number and name of trial registry                                                                                                                                              |
| Protocol                                                                            | 24      | Where the full trial protocol can be accessed, if available                                                                                                                                 |
| Funding                                                                             | 25      | Sources of funding and other support (such as supply of drugs), role of funders                                                                                                             |

\*We strongly recommend reading this statement in conjunction with the CONSORT 2010 Explanation and Elaboration<sup>19</sup> for important clarifications on all the items. If relevant, we also recommend reading CONSORT extensions for cluster randomised trials,<sup>11</sup> non-inferiority and equivalence trials,<sup>12</sup> non-pharmacological treatments,<sup>13</sup> herbal interventions,<sup>14</sup> and pragmatic

23. Cochrane Handbook for Systematic Reviews of Interventions Version 5.1.0. In: Higgins JPT, Green S, Eds. The Cochrane Collaboration; 2011.
