# Supplementary material
Source: HighWire-hosted journal article supplement (https://bmjopen.bmj.com/content/6/4/e010734)
Supplement: inline-supplementary-material-2 [file inline-supplementary-material-2.pdf]

## Appendix: 2

**Table S1.** Data extraction form: systematic review of authorship research

Reference number:  
Reviewer initials:  
Publication details:  
First author:  
Journal title and year:  
Volume and first page:  
Language, if not English:

**Study type:**  
 Descriptive  
 Before and after (no control)  
 Before and after (with control)  
 Randomised controlled trial  
 Any other

**Aim of the study:**

**Intervention:**

**Outcome measures:**

**Setting:**

Name of COUNTRY:

Type of environment:

Other descriptors of the academic setting:

Total study period:

If relevant:  
"Before" period

**Should this study be included in the review?**  
Yes  
No  
Maybe

Reasons for No or Maybe:

**Participants:**

**Outcome:**

| Outcome | How defined? | How measured? | Comments |
|---------|--------------|---------------|----------|
|         |              |               |          |
|         |              |               |          |
|         |              |               |          |

**Confounders:**

|  | Tick if controlled/restricted for | Describe how controlled for (and/or other comments) |
|--|-----------------------------------|-----------------------------------------------------|
|  |                                   |                                                     |
|  |                                   |                                                     |
|  |                                   |                                                     |

**Quality Scale**

|                                                                                                                      | Quality score | Explanation of score                                                                                                                     |
|----------------------------------------------------------------------------------------------------------------------|---------------|------------------------------------------------------------------------------------------------------------------------------------------|
| Was the intervention group representative of the population to which the results are generalised?                    |               | 0 = no randomisation<br>1 = quasi randomised<br>2 = randomised                                                                           |
| Were the comparison/control groups representative of the intervention groups?                                        |               | 0 = no control groups<br>1 = control groups poorly representative of intervention groups<br>2 = control groups adequately representative |
| Was there an objective and valid measure of outcome used?                                                            |               | 0 = Outcome poorly described or measured<br>1 = Partially described or valid<br>2 = Well described and valid                             |
| Were all the results provided with estimates of uncertainty (ie. Confidence intervals) and statistical significance? |               | 0 = none<br>1 = some<br>2 = all                                                                                                          |
| Were the main conclusions based on primary study hypotheses?                                                         |               | 0 = none<br>1 = some<br>2 = all                                                                                                          |
| Were all the important confounders measured and controlled for?                                                      |               | 0 = no or poorly controlled<br>1 = partially controlled<br>2 = adequately controlled                                                     |
| <b>TOTAL SCORE</b>                                                                                                   |               | 9-12 = good quality<br>6-8 = average quality<br>0-5 = poor quality                                                                       |

**Describe any other important sources of bias:****Results:**

| Outcome | How defined? | No. | Crude results (95% CI) | Adjusted results (95% CI) | Adjusted for which confounders? |
|---------|--------------|-----|------------------------|---------------------------|---------------------------------|
|         |              |     |                        |                           |                                 |
